# Supplementary material
Source: MDPI journal article supplement (https://www.mdpi.com/2673-7140/2/4/26)
Supplement: s1 [file s1]

## Supplementary Materials

**Table S1.** GLMM null and full model for positive controls. Response variables (var) are glucose titer (glu), trehalose titer (tre) and hsp70AB gene expression (hsp). n/f – null or full model, AIC – Akaike Information Criterion, df<sub>R</sub> – degrees of freedom for Residuals, var. – variance, s.d. – standard deviation, est. - estimate, s.e. – standard error, t – t-value, p – p-value for fixed effect, ANOVA – for comparison of models, df – degrees of freedom for the model, p – p-value for model comparison.

| ANOVA          |      |                      |              |                 |               |       |      |             |        |       |       |               |    |      |               |
|----------------|------|----------------------|--------------|-----------------|---------------|-------|------|-------------|--------|-------|-------|---------------|----|------|---------------|
| Random effects |      |                      |              |                 | Fixed effects |       |      |             |        |       |       |               |    |      |               |
| var            | n/f  | model                | AIC          | df <sub>R</sub> | name          | var.  | s.d. | name        | est.   | s.e.  | t     | p             | df | Chi² | p             |
| glu            | null | 1+ (1 cage)          | 0.2          | 35              | cage          | 1.83  | 1.35 | (intercept) | 0.364  | 0.004 | 93.73 | <2E-16        | 3  |      |               |
|                |      |                      |              |                 | resid         | 0.05  | 0.22 |             |        |       |       |               |    |      |               |
|                | full | treatment + (1 cage) | <b>-3.5</b>  | 34              | cage          | 0.25  | 0.50 | (intercept) | 0.366  | 0.048 | 7.64  | 2.1E-14       | 4  | 5.71 | <b>0.017</b>  |
|                |      |                      |              |                 | resid         | 0.04  | 0.20 | group       | -2.585 | 0.742 | -3.48 | <b>4.9E-4</b> |    |      |               |
| tre            | null | 1+ (1 cage)          | -42.3        | 35              | cage          | 0.51  | 0.71 | (intercept) | -0.045 | 0.041 | -1.10 | 0.27          | 3  |      |               |
|                |      |                      |              |                 | resid         | 0.02  | 0.13 |             |        |       |       |               |    |      |               |
|                | full | treatment + (1 cage) | <b>-46.1</b> | 34              | cage          | 0.05  | 0.21 | (intercept) | -0.043 | 0.041 | -1.06 | 0.29          | 4  | 5.83 | <b>0.016</b>  |
|                |      |                      |              |                 | resid         | 0.01  | 0.12 | group       | -1.552 | 0.268 | -5.80 | <b>6.7E-9</b> |    |      |               |
| hsp            | null | 1+ (1 cage)          | 345.2        | 37              | cage          | 735.4 | 27.1 | (intercept) | 3.547  | 0.114 | 31.17 | 2.0E-16       | 3  |      |               |
|                |      |                      |              |                 | resid         | 152.0 | 12.3 |             |        |       |       |               |    |      |               |
|                | full | treatment + (1 cage) | <b>324.5</b> | 36              | cage          | 0.0   | 0.0  | (intercept) | 3.564  | 0.110 | 32.27 | 2.0E-16       | 4  | 22.7 | <b>1.8E-6</b> |
|                |      |                      |              |                 | resid         | 152.0 | 12.3 | group       | -2.205 | 0.589 | -3.75 | <b>1.8E-4</b> |    |      |               |

**Table S2.** GLMM null and full model for cages with varying group size. Response variables (var) are glucose titer (glu), trehalose titer (tre) and hsp70AB gene expression (hsp). n/f – null or full model, AIC – Akaike Information Criterion, df<sub>R</sub> – degrees of freedom for Residuals, var. – variance, s.d. – standard deviation, est. - estimate, s.e. – standard error, t – t-value, p – p-value for fixed effect, ANOVA – for comparison of models, df – degrees of freedom for the model, p – p-value for model comparison. Table is continued on next page.

|     |      |                                 |       |                 | Random effects |       |      | Fixed effects |        |       |      | ANOVA   |    |      |      |  |
|-----|------|---------------------------------|-------|-----------------|----------------|-------|------|---------------|--------|-------|------|---------|----|------|------|--|
| var | n/f  | model                           | AIC   | df <sub>R</sub> | name           | var.  | s.d. | name          | est.   | s.e.  | t    | p       | df | Chi² | p    |  |
| glu | null | 1+ (1 cage) +<br>(1 trial)      | 65.3  | 124             | cage           | 0.06  | 0.26 | (intercept)   | -0.875 | 0.120 | -7.3 | 2.9E-13 | 4  |      |      |  |
|     |      |                                 |       |                 | trial          | 0.00  | 0.00 |               |        |       |      |         |    |      |      |  |
|     |      |                                 |       |                 | resid          | 0.09  | 0.30 |               |        |       |      |         |    |      |      |  |
|     | full | group + (1 cage)<br>+ (1 trial) | 67.2  | 123             | cage           | 0.07  | 0.26 | (intercept)   | -0.833 | 0.170 | -4.9 | 9.6E-7  | 5  | 0.11 | 0.74 |  |
|     |      |                                 |       |                 | trial          | 0.00  | 0.00 | group         | -0.003 | 0.010 | -0.3 | 0.742   |    |      |      |  |
|     |      |                                 |       |                 | resid          | 0.09  | 0.30 |               |        |       |      |         |    |      |      |  |
| tre | null | 1+ (1 cage) +<br>(1 trial)      | -82.3 | 124             | cage           | 0.05  | 0.24 | (intercept)   | -1.200 | 0.135 | -8.9 | 2.0E-16 | 4  |      |      |  |
|     |      |                                 |       |                 | trial          | 0.003 | 0.05 |               |        |       |      |         |    |      |      |  |
|     |      |                                 |       |                 | resid          | 0.028 | 0.17 |               |        |       |      |         |    |      |      |  |

|  |      |                                 |        |     |       |       |      |             |        |       |      |         |   |      |      |
|--|------|---------------------------------|--------|-----|-------|-------|------|-------------|--------|-------|------|---------|---|------|------|
|  | full | group + (1 cage)<br>+ (1 trial) | -80.4  | 123 | cage  | 0.059 | 0.24 | (intercept) | -1.180 | 0.167 | -7.1 | 1.6E-12 | 5 | 0.04 | 0.85 |
|  |      |                                 |        |     | trial | 0.002 | 0.05 | group       | -0.002 | 0.010 | -0.2 | 0.856   |   |      |      |
|  |      |                                 |        |     | resid | 0.028 | 0.17 |             |        |       |      |         |   |      |      |
|  | hsp  | 1 + (1 cage) +<br>(1 trial)     | -128.7 | 32  | cage  | 0.104 | 0.32 | (intercept) | -3.863 | 0.834 | -4.6 | 3.6E-6  | 4 |      |      |
|  |      |                                 |        |     | trial | 0.139 | 0.37 |             |        |       |      |         |   |      |      |
|  |      |                                 |        |     | resid | 0.001 | 0.04 |             |        |       |      |         |   |      |      |
|  | full | group + (1 cage)<br>+ (1 trial) | -126.9 | 31  | cage  | 0.092 | 0.30 | (intercept) | -3.667 | 0.943 | -3.9 | 1.0E-4  | 5 | 0.15 | 0.70 |
|  |      |                                 |        |     | trial | 0.136 | 0.37 | group       | -0.008 | 0.021 | -0.4 | 0.691   |   |      |      |
|  |      |                                 |        |     | resid | 0.001 | 0.04 |             |        |       |      |         |   |      |      |

**Table S3.** GLMM null and full model for cage vs colony. Response variables (var) are glucose titer (glu), trehalose titer (tre) and hsp70AB gene expression (hsp). n/f – null or full model, AIC – Akaike Information Criterion, dfr – degrees of freedom for Residuals, var. – variance, s.d. – standard deviation, est. - estimate, s.e. – standard error, t – t-value, p – p-value for fixed effect, ANOVA – for comparison of models, df – degrees of freedom for the model, p – p-value for model comparison. Table is continued on next page.

| var | n/f  | model                               | AIC          | dfr | Random effects |       |      | Fixed effects |        |       |        | ANOVA        |    |                  |              |
|-----|------|-------------------------------------|--------------|-----|----------------|-------|------|---------------|--------|-------|--------|--------------|----|------------------|--------------|
|     |      |                                     |              |     | name           | var.  | s.d. | name          | est.   | s.e.  | t      | p            | df | Chi <sup>2</sup> | p            |
| glu | null | 1 + (1 cage) +<br>(1 trial)         | 80.5         | 144 | cage           | 0.063 | 0.25 | (intercept)   | -0.812 | 0.005 | -165.5 | 2E-16        | 4  |                  |              |
|     |      |                                     |              |     | trial          | 0.002 | 0.04 |               |        |       |        |              |    |                  |              |
|     |      |                                     |              |     | resid          | 0.092 | 0.30 |               |        |       |        |              |    |                  |              |
|     | full | source +<br>(1 cage) +<br>(1 trial) | 81.6         | 143 | cage           | 0.067 | 0.26 | (intercept)   | -0.890 | 0.155 | -5.7   | 8.8E-9       | 5  | 0.88             | 0.35         |
|     |      |                                     |              |     | trial          | 0.003 | 0.06 | group         | 0.174  | 0.182 | 0.9    | 0.339        |    |                  |              |
|     |      |                                     |              |     | resid          | 0.092 | 0.30 |               |        |       |        |              |    |                  |              |
| tre | null | 1 + (1 cage) +<br>(1 trial)         | -72.9        | 144 | cage           | 0.075 | 0.27 | (intercept)   | -0.865 | 0.243 | -3.5   | 3.8E-4       | 4  |                  |              |
|     |      |                                     |              |     | trial          | 0.018 | 0.13 |               |        |       |        |              |    |                  |              |
|     |      |                                     |              |     | resid          | 0.032 | 0.18 |               |        |       |        |              |    |                  |              |
|     | full | source +<br>(1 cage) +<br>(1 trial) | <b>-79.6</b> | 143 | cage           | 0.050 | 0.22 | (intercept)   | -1.246 | 0.237 | -5.3   | 1.4E-7       | 5  | 8.71             | <b>0.003</b> |
|     |      |                                     |              |     | trial          | 0.013 | 0.12 | group         | 0.405  | 0.131 | 3.1    | <b>0.002</b> |    |                  |              |
|     |      |                                     |              |     | resid          | 0.031 | 0.18 |               |        |       |        |              |    |                  |              |
| hsp | null | 1 + (1 cage) +<br>(1 trial)         | -212.1       | 58  | cage           | 0.164 | 0.40 | (intercept)   | -3.836 | 0.592 | -6.5   | 9.4E-11      | 4  |                  |              |
|     |      |                                     |              |     | trial          | 0.087 | 0.29 |               |        |       |        |              |    |                  |              |
|     |      |                                     |              |     | resid          | 0.002 | 0.04 |               |        |       |        |              |    |                  |              |

|      |                                     |               |    |       |       |      |             |        |       |      |              |   |      |              |
|------|-------------------------------------|---------------|----|-------|-------|------|-------------|--------|-------|------|--------------|---|------|--------------|
| full | source +<br>(1 cage) +<br>(1 trial) | <b>-218.1</b> | 57 | cage  | 0.061 | 0.25 | (intercept) | -3.559 | 0.719 | -4.9 | 7.5E-7       | 5 | 8.01 | <b>0.005</b> |
|      |                                     |               |    | trial | 0.132 | 0.36 | group       | -1.167 | 0.571 | -2.0 | <b>0.041</b> |   |      |              |
|      |                                     |               |    | resid | 0.001 | 0.04 |             |        |       |      |              |   |      |              |

**Table S4.** Welch t-test for positive controls and cage vs colony. Response variables (var) are glucose titer (glu), trehalose titer (tre) and hsp70AB gene expression (hsp). Means are derived from log-transformed data. T – t-value, df – degrees of freedom, P - p-value. Significant values indicated by bold letters.

| <b>positive control</b> | <b>var</b> | <b>mean<sub>control</sub></b> | <b>mean<sub>stressor</sub></b> | <b>t</b> | <b>df</b> | <b>P</b>       |
|-------------------------|------------|-------------------------------|--------------------------------|----------|-----------|----------------|
|                         | glu        | 0.34                          | -2.08                          | 15.04    | 34.0      | <b>2.2E-16</b> |
|                         | tre        | -0.06                         | -1.63                          | 11.72    | 29.4      | <b>1.3E-12</b> |
|                         | hsp        | -3.33                         | -1.32                          | -8.37    | 9.8       | <b>8.8E-6</b>  |
| <b>cage vs colony</b>   | <b>var</b> | <b>mean<sub>cage</sub></b>    | <b>mean<sub>colony</sub></b>   | <b>t</b> | <b>df</b> | <b>P</b>       |
|                         | glu        | -1.06                         | -0.95                          | -0.61    | 25.4      | 0.55           |
|                         | tre        | -1.36                         | -0.90                          | -3.33    | 33.0      | <b>0.002</b>   |
|                         | hsp        | -3.67                         | -4.23                          | 2.69     | 59.2      | <b>0.009</b>   |

**Table S5.** Samples and sample size for different experiments. N – total sample size setup for experimental period of 7 days. N<sub>experiments</sub> – available number of individuals for subsequent physiological marker analysis.

|                   | <b>Replicate 1</b> |                                | <b>Replicate 2</b> |                                | <b>Total</b>                          |                                |
|-------------------|--------------------|--------------------------------|--------------------|--------------------------------|---------------------------------------|--------------------------------|
| <b>Group size</b> | <b>N</b>           | <b>N<sub>experiments</sub></b> | <b>N</b>           | <b>N<sub>experiments</sub></b> | <b>N glucose/trehalose experiment</b> | <b>N hsp70 gene expression</b> |
| <b>1</b>          | 10                 | 8                              | 10                 | 4                              | 12                                    | 6                              |
| <b>10</b>         | 10                 | 9                              | 10                 | 9                              | 18                                    | 6                              |
| <b>10</b>         | 10                 | 8                              | 10                 | 10                             | 18                                    | 6                              |
| <b>10</b>         | 10                 | 10                             | 10                 | 10                             | 20                                    | 6                              |
| <b>30</b>         | 30                 | 10                             | 30                 | 10                             | 20                                    | 6                              |
| <b>30</b>         | 30                 | 10                             | 30                 | 10                             | 20                                    | 6                              |
| <b>30</b>         | 30                 | 10                             | 30                 | 10                             | 20                                    | 6                              |
| <b>colony</b>     | 10                 | 10                             | 10                 | 10                             | 20                                    | 20                             |
| <b>total</b>      | <b>140</b>         | <b>75</b>                      | <b>140</b>         | <b>73</b>                      | <b>148</b>                            | <b>62</b>                      |
